# Supplementary material for: Finding Alternatives to the Dogma of Power Based Sample Size Calculation: Is a Fixed Sample Size Prospective Meta-Experiment a Potential Alternative?
Source: PubMed Central journal article supplement (PMC4928786; doi:10.1371/journal.pone.0158604), 2016-06-30
Supplement: pone.0158604.s001.pdf [file pone.0158604.s001.pdf]

# 1 Appendix

We assume that the true log odds ratio  $\theta$  is normally distributed with mean  $\mu_{\theta}^{th}$  and standard deviation (SD)  $\sigma_{\theta}^{th}$ . The success rate in the control group  $p_C$  is assumed to be beta distributed. The success rate in the treatment group  $p_T$  is deduced from  $p_C$  and  $\theta$ .

## Conventional approach

### Theoretical values

For one simulation, the theoretical values are sampled from the theoretical distribution:

$$\theta \sim \mathcal{N}(\mu_{\theta}^{th}, \sigma_{\theta}^{2th}) \quad (1)$$

$$p_C \sim \mathcal{Beta}(6, 14) \quad (2)$$

In the situation with no treatment effect  $\mu_{\theta}^{th} = 0$ , in the situation with a non null treatment effect  $\mu_{\theta}^{th} = \log(1.5)$ . The SD  $\sigma_{\theta}^{th}$  equals 0.1.  $p_T$  is calculated from the formula

$$\frac{p_T/(1-p_T)}{p_C/(1-p_C)} = \exp(\theta) \quad (3)$$

### Postulated hypothesis

We then consider that the postulated hypothesis used for the sample size calculation differs from the theoretical values. We let  $\epsilon_{\theta}$  be the relative error on the log OR and  $\epsilon_{p_C}$  the relative error on the control group event rate after an angular transformation. We used data from a previously published review [1] to calibrate these errors: they are sampled from normal distributions with mean 0.082 and SD 5.583 for  $\epsilon_{\theta}$  and mean 0.026 and SD 0.301 for  $\epsilon_{p_C}$ .

$$\theta^{post} = (1 + \epsilon_{\theta})\theta \quad (4)$$

$$\arcsin(\sqrt{p_C^{post}}) = (1 + \epsilon_{p_C})\arcsin(\sqrt{p_C}) \quad (5)$$

$p_T^{post}$  is calculated from the formula

$$\frac{p_T^{post}/(1-p_T^{post})}{p_C^{post}/(1-p_C^{post})} = \exp(\theta^{post}) \quad (6)$$

Furthermore, the success rates are restricted to [5%; 95%] and the treatment effect is restricted to [0.2;2.22], the 95% range observed on the data.

### Sample size calculation

The number of patients to be recruited in each group is calculated as:

$$n = \frac{2(Z_{1-\frac{\alpha}{2}} + Z_{\beta})^2}{\Delta^2} \quad (7)$$

with

$$\Delta = \frac{p_T^{post} - p_C^{post}}{\sqrt{\frac{p_T^{post}(1-p_T^{post}) + p_C^{post}(1-p_C^{post})}{2}}}, \quad (8)$$

and  $Z_q$  is the  $q$ -percentile of a standard normal distribution.

### Data generation

The number of events in the control group  $X_C^n$  and the treatment group  $X_T^n$  are sampled from binomial distributions. The number of events are sampled considering the true parameter  $p_C$  and  $p_T$  rather than the postulated ones,  $p_C^{post}$  and  $p_T^{post}$ .

$$X_C^n \sim \mathcal{B}(n, p_C), \quad X_T^n \sim \mathcal{B}(n, p_T), \quad (9)$$

The observed treatment effect is the log odd ratio  $\hat{\theta}$  defined as

$$\hat{\theta} = \log \left( \frac{x_T^n / (n - x_T^n)}{x_C^n / (n - x_C^n)} \right), \quad (10)$$

with estimated variance  $V$

$$V = 1/x_C^n + 1/(n - x_C^n) + 1/x_T^n + 1/(n - x_T^n). \quad (11)$$

### Analysis

The 95% confidence interval for the log odd ratio is calculated as

$$95\% \text{ CI} = [\hat{\theta} - Z_{1-\frac{\alpha}{2}}\sqrt{V}; \hat{\theta} + Z_{1-\frac{\alpha}{2}}\sqrt{V}] \quad (12)$$

### Meta-experiment approach

The meta-experiment approach involves three trials of 100 subjects each.

### Theoretical values

For one simulation, the 3 sets of theoretical values are sampled from the theoretical distributions:

$$\theta^i \sim \mathcal{N}(\mu_{\theta}^{th}, \sigma_{\theta}^{2th}), \quad i = 1, 2, 3 \quad (13)$$

$$p_C^i \sim \text{Beta}(6, 14), \quad i = 1, 2, 3 \quad (14)$$

$p_T^i$  are calculated from the formula

$$\frac{p_T^i / (1 - p_T^i)}{p_C^i / (1 - p_C^i)} = \exp(\theta^i), \quad i = 1, 2, 3 \quad (15)$$

### Sample size calculation

The number of subjects to be recruited in each trial is 100.

### Data generation

For trial  $i = 1, 2, 3$ , the number of events in the control group  $X_C^i$  and the treatment group  $X_T^i$  are sampled from binomial distributions

$$X_C^i \sim \mathcal{B}(50, p_C^{th,i}), \quad X_T^i \sim \mathcal{B}(50, p_T^{th,i}), \quad (16)$$

and the observed treatment effects are the log odds ratios  $\hat{\theta}^i$  defined as

$$\hat{\theta}^i = \log \left( \frac{x_T^i / (50 - x_T^i)}{x_C^i / (50 - x_C^i)} \right), \quad (17)$$

with estimated variance  $V_i$

$$V^i = 1/x_C^i + 1/(50 - x_C^i) + 1/x_T^i + 1/(50 - x_T^i). \quad (18)$$

### Analysis

The observed effect  $\hat{\theta}^i$  for any study is given by the mean  $\mu$ , the deviation of the study's true effects from the mean, and the deviation of the study's observed effect from the study's true effect. That is

$$\hat{\theta}^i = \mu + \xi^i + \epsilon^i, \quad (19)$$

with  $\xi^i \sim \mathcal{N}(0, \sigma_\theta^{2th})$  and  $\epsilon^i \sim \mathcal{N}(0, V^i)$ . Under the random effect model the weight assigned to each study is  $w^i = \frac{1}{V^i + \tau^2}$  where  $\tau^2$  is an estimate of  $\sigma_\theta^{2th}$  from the existing studies (eg the DerSimonian-Laird estimate [2]). The meta-analysis effect estimate is

$$\hat{\theta} = \frac{\sum_{i=1}^3 w^i \hat{\theta}^i}{\sum_{i=1}^3 w^i} \quad (20)$$

with approximate variance

$$var(\hat{\theta}) = \frac{1}{\sum_{i=1}^3 w^i} \quad (21)$$

The 95% confidence interval for the log odd ratio is calculated as

$$95\% \text{ CI} = [\hat{\theta} - Z_{1-\frac{\alpha}{2}} \sqrt{var(\hat{\theta})}; \hat{\theta} + Z_{1-\frac{\alpha}{2}} \sqrt{var(\hat{\theta})}] \quad (22)$$

## References

- [1] Charles P, Giraudeau B, Dechartres A, Baron G, Ravaud P. Reporting of sample size calculation in randomised controlled trials: review. *BMJ (Clinical research ed)*. 2009;338:b1732.
- [2] DerSimonian R, Laird N. Meta-analysis in clinical trials. *Controlled Clinical Trials*. 1986 Sep;7(3):177–188.
